# Supplementary material for: An overview of sedimentary volcanism on Mars
Source: Copernicus journal article supplement (doi:10.5194/esurf-11-633-2023), 2023-07-20
Supplement: Supplementary file 1 [file esurf-11-633-2023-supplement.zip]

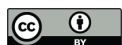

## *Supplement of*

# **An overview of sedimentary volcanism on Mars**

**Petr Brož et al.**

*Correspondence to:* Petr Brož ([petr.broz@ig.cas.cz](mailto:petr.broz@ig.cas.cz))

- [esurf-11-633-2023-supplement-title-page.pdf](#)
- [data.xlsx](#)

The copyright of individual parts of the supplement might differ from the article licence.
